# Supplementary figures and images for: Overlooking the Canadian Indigenous demographic data: a response to Mallard et al's call for data on COVID-19 and Indigenous populations
Source: HighWire-hosted journal article supplement (doi:10.1136/bmjgh-2022-008847), 2022-03-01

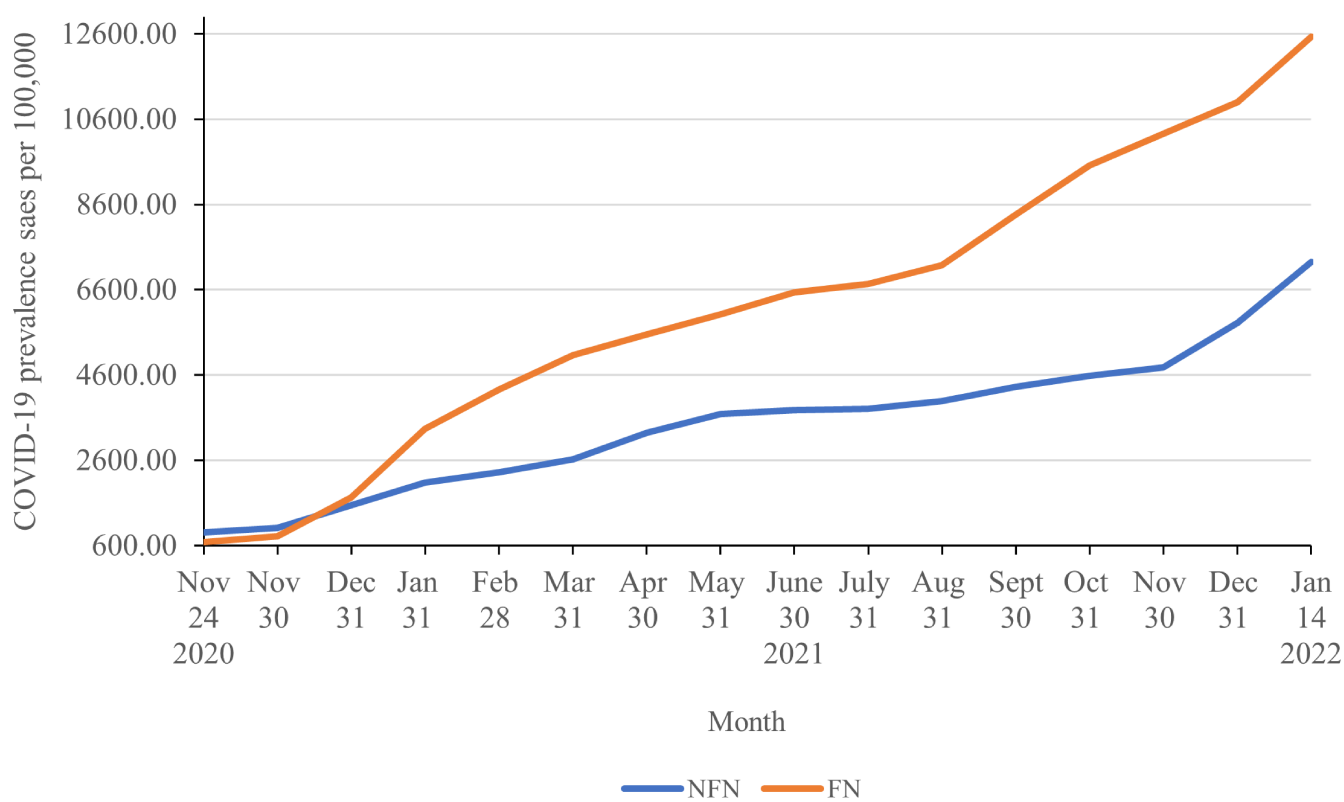

Supplement: bmjgh-2022-008847supp001_data_supplement.pdf [file bmjgh-2022-008847supp001_data_supplement.pdf]
